# Supplementary figures and images for: Preparation and Properties of Antibacterial Silk Fibroin Scaffolds
Source: MDPI journal article supplement (doi:10.3390/polym15234581), 2023-11-30

## Supplementary materials

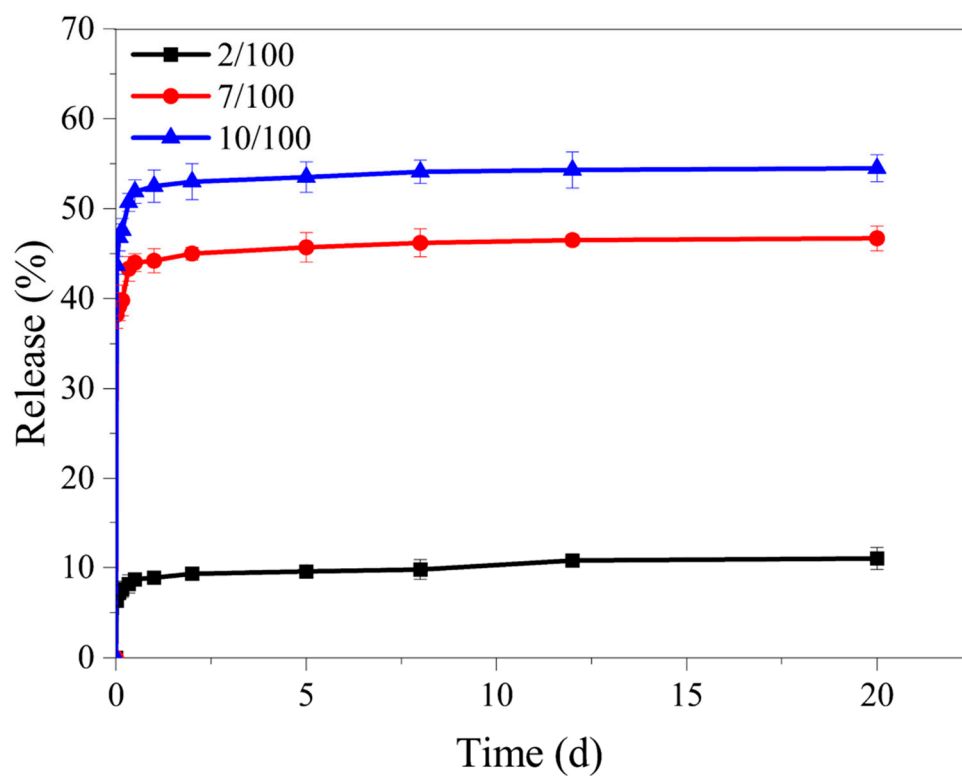

Figure S1. PHMB release within 20 d from hybrid scaffolds.

Supplement: s1 [file s1]
